# Glucagon-Like Peptide 1–Based Therapies for Type 2 Diabetes: A Focus on Exenatide

Kathleen Dungan, MD, and John B. Buse, MD, PhD

**G**lucagon-like peptide 1 (GLP-1) is produced by the proglucagon gene in L-cells of the small intestine in response to nutrients.<sup>1</sup> It stimulates glucose-dependent insulin release from the pancreatic islets. In addition to its insulinotropic effects, it is thought to exert antihyperglycemic effects by slowing gastric emptying,<sup>2</sup> inhibiting inappropriate glucagon release,<sup>3</sup> stimulating  $\beta$ -cell proliferation<sup>4</sup> and differentiation,<sup>5</sup> and improving satiety.<sup>6</sup>

GLP-1 secretion is decreased in type 2 diabetes, thus making it a logical target for novel treatments of type 2 diabetes.<sup>7</sup> In clinical trials, GLP-1 effects are evident regardless of the duration or severity of diabetes.<sup>8</sup> Thus, modulating GLP-1 levels and GLP-1 activity through administration of the native hormone, analogs, and mimetics or by inhibiting its degradation has become a major focus of investigation for treating type 2 diabetes over the past decade.

Exenatide is a GLP-1 mimetic, a synthetic form of the naturally occurring reptilian hormone exendin-4. It has been submitted for review by the Food and Drug Administration and could become available on the U.S. market by mid-2005.

As shown in Figure 1, GLP-1 enhances essentially all steps of insulin synthesis and secretion, including insulin gene transcription<sup>9</sup> and upregulation of glucokinase and GLUT2, the rate-limiting steps in  $\beta$ -cell glucose sensing.<sup>10</sup> Its G-protein coupling to adenylyl cyclase also leads to activation of pancreatic and duodenal homeobox gene-1 via a pathway that is thought to regulate expres-

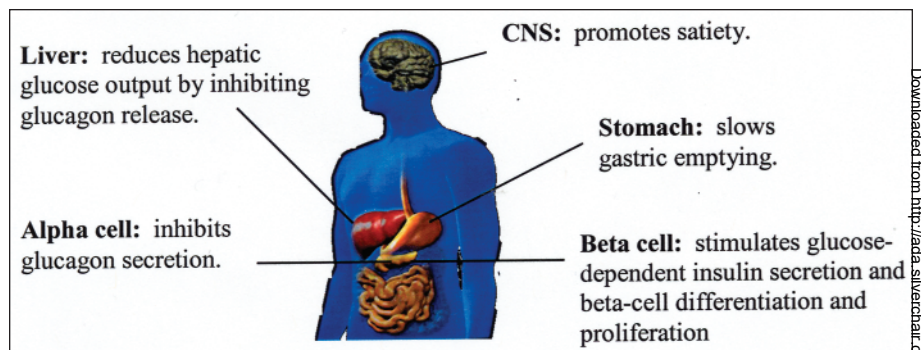

**Figure 1. Multiple sites of action for GLP-1. CNS, central nervous system.**

sion of genes for insulin and  $\beta$ -cell growth and differentiation.<sup>11</sup> GLP-1 binds to a seven-transmembrane G-protein–coupled receptor of the subfamily that includes receptors for secretin, vasoactive intestinal peptide, and gastric inhibitory peptide.<sup>12</sup> The receptor is found on pancreatic periductal cells and  $\beta$ -cells and in the kidney, heart, stomach, and brain.<sup>13</sup> GLP-1 receptor (GLP-1R) knockout mice have fasting hyperglycemia and abnormal glucose tolerance but are not obese.<sup>14</sup>

GLP-1 exhibits a relatively short half-life (1–2 minutes) that necessitates continuous infusion to achieve steady

state in pharmacological studies.<sup>15</sup> This is attributed to  $\text{NH}_2$ -terminal degradation by dipeptidyl peptidase IV (DPP-IV).<sup>1</sup> Mice lacking DPP-IV exhibit reduced food intake, improved insulin sensitivity, and decreased loss of  $\beta$ -cell mass.<sup>16</sup> Numerous analogs have been developed that have a longer half-life, mediated by resistance to DPP-IV degradation.

Exendin-4 is a naturally occurring component of the saliva of the Gila monster (*Heloderma suspectum*).<sup>17</sup> It has 53% homology with mammalian GLP-1.<sup>17</sup> It is resistant to DPP-IV because of a key difference in amino acid sequence: glycine at position 2.<sup>18</sup> Exendin-4 has a very high affinity for the GLP-1R, an effect mediated by differences in its COOH terminus.<sup>11</sup> Interestingly, exendin-4 is transcribed via a gene that is distinct from the mammalian counterpart of GLP-1 and therefore likely serves some unique function for the Gila monster beyond that of the GLP-1 system.

There are some differences between exendin-4 and GLP-1 that suggest that not all of exendin-4's actions are mediated by the GLP-1R. Exendin-4 increases the insulin sensitivity of cultured L6 myotubes and 3T3-adipocytes, whereas

## IN BRIEF

Therapies based on the incretin hormone glucagon-like peptide 1 are novel treatment options for type 2 diabetes that act through a variety of complementary mechanisms. Exenatide, which will likely become the first application to reach the market, has shown promise in phase III trials in reducing hemoglobin A<sub>1c</sub> without causing significant hypoglycemia or weight gain.



GLP-1 increases the sensitivity of L6 myotubes only.<sup>19</sup> Whether the GLP-1R is present in adipocytes is unclear, but if so, it must be structurally or functionally different.<sup>20,21</sup> In addition, intraportal infusion of GLP-1, but not exendin-4, leads to hepatic vagal afferent stimulation, which in turn may regulate pancreatic hormone secretion.<sup>22</sup>

In vitro, exendin-4 has been shown to bind to the GLP-1R of rat islets.<sup>15</sup> Exendin-4 exhibits dose-dependent augmentation of insulin secretion; the 63% greater insulinotropic action of exendin-4 versus GLP-1 has been attributed to its slower clearance.<sup>21</sup> Of interest, insulinotropic effects in vitro are seen at glucose concentrations as low as 55 mg/dl, but in humans this effect was suppressed as the plasma glucose approached 72 mg/dl.<sup>23</sup>

### Effects of Exendin-4 in Animals

Similar to in vitro studies, Harlan Sprague-Dawley rats administered exendin-4 exhibit a glucose-stimulated, dose-dependent increase in insulin levels, but there is a 100-fold greater potency in vivo than that observed in vitro.<sup>15</sup> Thus, its effects are not entirely intrinsic to islets, but they are influenced by the surrounding biochemical and hormonal milieu. In *db/db* mice, fasting glucose is normalized after 12 weeks of therapy.<sup>24</sup> At 12 weeks, hemoglobin A<sub>1c</sub> (A1C) was 4.1% lower in treated mice than in control mice. Exendin-4 also significantly and dose-dependently lowered fasting glucose in four diabetic rhesus monkeys by up to 37%.<sup>25</sup>

Exendin-4 may enhance satiety and weight loss through slowed gastric emptying, as well as through centrally mediated mechanisms. It has been shown to cross the blood-brain barrier and enter the brain parenchyma in mice.<sup>26</sup> In addition, exendin-4 has been found to bind receptors in the hypothalamus and thalamus in a pattern identical to that for GLP-1.<sup>27</sup> Exendin-4 lowered food intake and body weight in *db/db* mice through 5 days of treatment, but this was not sustained.<sup>28</sup> Furthermore, GLP-1R knockout

mice do not exhibit obesity, suggesting that other mechanisms compensate for weight maintenance.<sup>14</sup>

Weight loss and decreased food intake were illustrated in two studies of Zucker rats, an animal model of type 2 diabetes in which a leptin receptor mutation causes overeating and subsequent obesity. In one study, exendin-4 produced a dose-dependent reduction in food intake and body weight (up to 5.6%) after 6 weeks.<sup>25</sup> Another study demonstrated significantly decreased visceral and subcutaneous fat deposition (70% gain in control rats vs. 42% gain in treated rats) after exendin-4 treatment for 8 weeks.<sup>28</sup> Twice-daily, but not once-daily, injections resulted in sustained decrease in food intake and significantly slower weight gain.

### Exenatide Effects in Human Studies

Exenatide is synthetically produced exendin-4. Studies of exenatide's acute effects were performed by Egan et al.<sup>23</sup> Hyperglycemic clamps of seven healthy subjects and seven insulin-naïve patients with type 2 diabetes demonstrated four-fold potentiation of insulin response with a 1-hour exenatide infusion at 0.15 pmol/kg body wt/minute. This effect persisted several hours beyond the cessation of the infusion, demonstrating its substantial biological half-life. Furthermore, increased C-peptide levels suggest that the increase in insulin levels was related to increased secretion and not to a reduction in insulin clearance. Basal glucagon levels fell, and glucose clearance increased, in both groups with exenatide therapy. Exenatide also prevented the postprandial rise in insulin and glucose 3 hours after completion of the exenatide infusion. Finally, insulin levels dropped after stopping the glucose infusion as glucose levels fell, substantiating that the insulinotropic effect is glucose dependent.

A longer study<sup>29</sup> was completed using exenatide, 12 pmol/kg subcutaneously, up to twice daily in nine insulin-naïve patients with type 2 diabetes. A1C decreased significantly from

9.1 to 8.3% after only 1 month. Fasting glucose dropped significantly, but postprandial glucose decreased only immediately after breakfast, possibly reflecting inadequate dosage or duration. There was no waning of effect throughout the month, indicating that there was no significant down regulation of the GLP-1R. In this study, there was no change in BMI or in percentage of lean or fat mass as determined by dual energy X-ray absorptiometry after 1 month of therapy.

Hyperinsulinemic-euglycemic clamps in this study<sup>29</sup> were inconclusive in demonstrating effects on insulin sensitivity. Overall, the effect of exenatide on insulin sensitivity is unclear. Apparent increases in insulin sensitivity are confounded by the effects of ameliorating glucotoxicity, as well as by alterations in gastric emptying and insulin and glucagon secretion.<sup>30</sup>

Kolterman et al.<sup>31</sup> reported two blinded, placebo-controlled, crossover studies using exenatide. The first study examined the postprandial glucose response to 0.1 µg/kg of exenatide or placebo twice daily for 5 days. Exenatide resulted in significant reductions in postprandial glucose, insulin, and area under the curve for glucose and insulin, which did not wane through day 5. The drop in glucose appeared to be out of proportion to the stimulation of insulin secretion, suggesting that perhaps insulin sensitivity was enhanced.

Gastric emptying may paradoxically be accelerated in patients with diabetes.<sup>32</sup> Gastric emptying was also reduced in the Kolterman, et al. study<sup>31</sup> and likely contributed to exenatide's effects on satiety and hyperglycemia. This was also demonstrated in a study of patients with no residual  $\beta$ -cell function, and thus no insulin reserve, who nevertheless showed improvements in hyperglycemia on exenatide.<sup>33</sup>

Kolterman also demonstrated a reduction in glucagon with exenatide therapy.<sup>31</sup> Both fasting and postprandial glucagon were reduced, indicating that the reduction in gastric emptying was not likely to be the mechanism. Patients

with type 2 diabetes are known to exhibit inappropriate elevations of fasting and postprandial glucagons.<sup>34</sup> This therapeutic effect is unique to exenatide among antidiabetic agents.<sup>35</sup>

A large, randomized, triple-blind, placebo-controlled trial was performed at 24 sites with 109 patients with type 2 diabetes (A1C 8–11%) treated concomitantly with sulfonylurea, metformin, or both over 28 days.<sup>36</sup> Patients received either three premeal injections per day of exenatide, one injection of placebo plus two injections of exenatide at variable mealtimes, or three injections of placebo. A1C had dropped significantly by 0.9% at 28 days. There were also significant reductions in postprandial but not fasting glucose. The homeostasis model assessment, an indicator of  $\beta$ -cell function, was significantly improved after therapy. This was ascertained when plasma concentration of exenatide was negligible, suggesting a fundamental change in  $\beta$ -cell function over 28 days. There was no significant effect of therapy on body weight, lipids, vital signs, or laboratory parameters. Antibodies to exenatide were detected in 19% of subjects, but there was no evidence for a diminished glycemic response in these patients. Nausea was reported in 31% of patients, most of which was mild to moderate and declined substantially after the first week. Hypoglycemia was seen in 15% of patients, but only in those who were simultaneously treated with sulfonylureas.

The possibility of the development of tolerance to exenatide-associated nausea was investigated in 123 type 2 diabetic patients at 31 sites.<sup>37</sup> This randomized, triple-blind, placebo-controlled trial found a reduction in severe nausea (47.5 vs. 31.1%) and vomiting (29.0 vs. 9.7%) in patients who had dose escalation as part of treatment initiation versus those who had not. Safety was further demonstrated in a study of 12 healthy volunteers, in which the counterregulatory response to insulin-induced hypoglycemia was preserved with exenatide therapy.<sup>38</sup>

Long-term efficacy was demonstrated in a triple-blind, placebo-controlled trial at 101 sites with 377 type 2 diabetic patients.<sup>39</sup> Subjects were included if they had been on a maximally effective dose of sulfonylurea as monotherapy. Subjects underwent a 4-week, single-blind lead-in period with placebo injections followed by randomization to one of four treatment arms. Subjects received either 5 or 10  $\mu$ g of exenatide twice daily or one of two placebo arms using equivalent volumes of placebo. A 4-week dose escalation period was used in the 10- $\mu$ g arm. Results were analyzed in an intention-to-treat manner.

At 30 weeks, A1C had decreased by 0.86% in the 10- $\mu$ g arm and 0.46% in the 5- $\mu$ g arm (Figure 2). In the 10- $\mu$ g arm 34.2% and in the 5- $\mu$ g arm, 26.7% were able to reach an A1C of < 7%, with larger reductions occurring in those with higher baseline A1C levels. Furthermore, body weight decreased significantly at 30 weeks, by -1.6 kg in the 10- $\mu$ g group (Figure 3). Weight loss was not related to the incidence of nausea, and withdrawal because of nausea was low, at 4% in the 10- $\mu$ g arm and 2% in the 5- $\mu$ g arm. Anti-exenatide antibodies were reported in 41% of subjects, but there was no predictive effect on overall glycemic control.

Another study<sup>40</sup> using metformin plus exenatide for 30 weeks has also

been completed and has shown more impressive weight loss (Table 1) with similar efficacy. Finally, preliminary results from a trial adding exenatide to maximally effective doses of metformin plus sulfonylurea showed similar results at 30 weeks.<sup>41</sup> An open-label extension to 52 weeks showed sustained improvement in A1C.

As noted above, exendin-4 has shown some benefit with respect to producing weight loss in patients with type 2 diabetes. In eight healthy humans, a randomized, double-blind, placebo-controlled crossover trial demonstrated a significant reduction (19%) in caloric consumption, despite no difference in reported satiety or nausea.<sup>42</sup>

Other studies using native GLP-1 instead of exenatide have been performed in healthy subjects and in those with diabetes; most,<sup>43–46</sup> but not all,<sup>47</sup> also show comparable reductions in caloric intake.

Effects of exenatide on cardiac function have not been examined to date. However, GLP-1 may have beneficial cardiac effects that are of obvious interest in diabetes management. Patients with coronary artery disease have shown improved endothelial dysfunction.<sup>48</sup> In a dog model of heart failure, GLP-1 has left ventricular hemodynamics, including a 57% increased cardiac output and increased myocardial glucose uptake.<sup>49</sup>

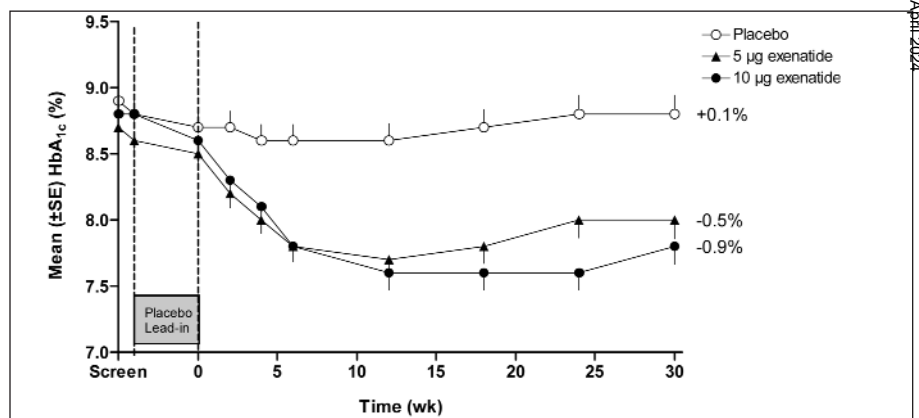

**Figure 2.** Effects of sulfonylurea plus exenatide or placebo on A1C in subjects with type 2 diabetes (intent-to-treat analysis). Placebo,  $n = 123$ ; 5  $\mu$ g exenatide,  $n = 125$ ; 10  $\mu$ g exenatide,  $n = 129$ .  $P < 0.0001$  for reduction from baseline in both exenatide arms for weeks 6–30 versus placebo. Adapted from Buse et al.<sup>39</sup>

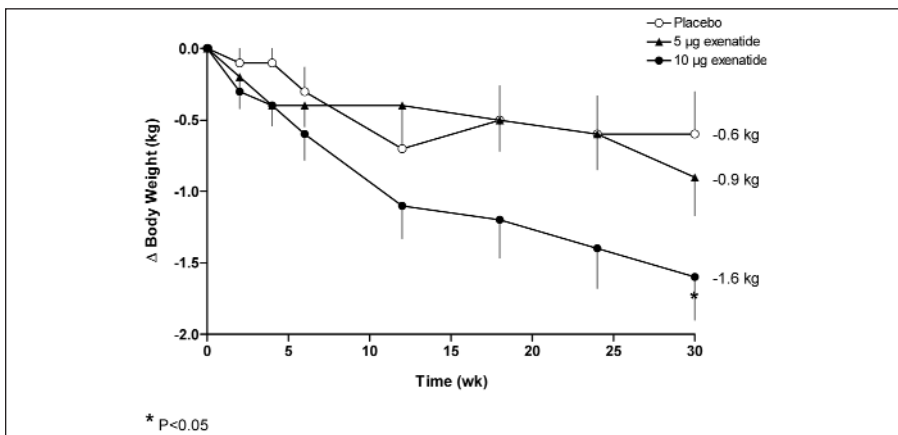

**Figure 3.** Change in body weight from baseline over time in subjects with type 2 diabetes treated with sulfonylurea and exenatide or placebo (intent-to-treat analysis). Baseline weights were  $95.2 \pm 1.6$  kg in the 10  $\mu$ g exenatide arm ( $n = 129$ ),  $94.9 \pm 1.7$  kg in the placebo arm ( $n = 123$ ). Data are means  $\pm$  SE. \* $P < 0.05$  compared with placebo treatment. Adapted from Buse et al.<sup>39</sup>

#### Additional Potential Effects in Humans: Diabetes Prevention and Augmentation of $\beta$ -Cell Mass

The progressive loss of  $\beta$ -cell function and mass is an early feature of type 2 diabetes, eventually leading to insulin dependence in many patients.<sup>50</sup> Intervening early in the course of diabetes or perhaps in the prediabetic state to stimulate  $\beta$ -cell differentiation and/or reduce apoptosis could theoretically halt the progression of the disease. Both GLP-1 and exenatide have shown promise in this respect.

Exenatide may exert either a direct or an indirect effect on  $\beta$ -cell mass. Indirectly, exenatide may act by reducing hyperglycemia, which is known to cause  $\beta$ -cell dysfunction and interfere with neogenesis.<sup>51,52</sup> However, even normoglycemic rats have shown  $\beta$ -cell neogenesis in response to exenatide.<sup>53</sup> Additionally, exenatide's effects on  $\beta$ -cell mass may simply result from the nonspecific growth factor effect of the augmented insulin supply itself.<sup>54</sup> On the other hand, a direct effect on  $\beta$ -cell mass may also be inferred from GLP-1R knockout mice, which display deficient  $\beta$ -cells.<sup>14</sup> Furthermore, the GLP-1R was found in pancreatic ducts, a presumed site of origin for  $\beta$ -cell precursors,<sup>13</sup> and in animal models treated with exenatide, neogenesis appeared to be derived from these

precursors.<sup>55</sup> In vitro, exenatide stimulated islet progenitor cells and pancreatic tumor cells to differentiate into insulin-producing cells.<sup>56,57</sup>

In rats undergoing partial pancreatectomy, exenatide resulted in a 40% expansion of  $\beta$ -cell mass without a change in cell size, indicating that the increase resulted from hyperplasia or recruitment of precursors and not hypertrophy.<sup>53</sup> Unfortunately, the newly recruited  $\beta$ -cells did not attain a fully functional phenotype, and insulin secretion was not normalized.

The most dramatic results were seen in the intrauterine growth-retarded rat, a model of type 2 diabetes.<sup>58</sup> Exenatide was shown to prevent diabetes by com-

pletely rescuing the otherwise inevitable progressive 80% reduction in  $\beta$ -cell mass. By 18 months, untreated rats were all dead, whereas those treated with only 6 days of exenatide were indistinguishable from normal rats. There was also a significant reduction in obesity. These studies used very young animals that theoretically might be more ideal candidates for regeneration in general. However, aging glucose-intolerant rats treated with GLP-1 also showed beneficial results.<sup>59</sup>

#### Future Directions

Other GLP-1 analogs that are resistant to DPP IV degradation have shown results similar to those of exendin-4.<sup>60</sup> In addition, a long-acting release form of exenatide, which may be given once a month, is being developed.<sup>61</sup> DPP IV inhibitors have the distinct advantage of oral administration. In animal models, DPP IV resulted in sustained improvement in glucose tolerance, insulinemia,  $\beta$ -cell glucose responsiveness, peripheral insulin sensitivity, and  $\beta$ -cell mass.<sup>62–64</sup> A 12-week randomized, double-blind, placebo-controlled study of 107 patients with type 2 diabetes on a stable dose of metformin monotherapy resulted in a significant 0.6% drop in A1C.<sup>65</sup> Fifty-eight of these patients participated in a 40-week extension resulting in stabilization of A1C and an overall 1.1% lower A1C than placebo. Of these GLP-1-based therapies, exendin-4

**Table 1. U.S. Clinical Trials of Exenatide: Summary of Selected Outcomes**

|                                        | Study with metformin | Study with maximum dose of a sulfonylurea | Study with metformin plus sulfonylurea |
|----------------------------------------|----------------------|-------------------------------------------|----------------------------------------|
| Change in A1C (placebo adjusted)       | ↓ 0.9%               | ↓ 1.0%                                    | ↓ 1.0%                                 |
| Weight change                          | ↓ 1.3–2.5 kg         | ↓ 0.3–1.0 kg                              | ↓ 0.7 kg                               |
| Nausea (placebo vs. 10 $\mu$ g)        | 23 vs. 45%           | 7 vs. 51%                                 | 21 vs. 49%                             |
| Severe nausea (placebo vs. 10 $\mu$ g) | 2 vs. 4%             | 2 vs. 5%                                  | 1 vs. 3%                               |
| Hypoglycemia (placebo vs. 10 $\mu$ g)  | 5 vs. 5%             | 3 vs. 36%                                 | 13 vs. 28%                             |

in the form of exenatide, will likely be the first to reach the market.

## Conclusions

GLP-1-based therapy would be a novel and complementary approach to diabetes management for several reasons. It is the first insulin secretagogue that does not cause hypoglycemia. It does not cause the weight gain that may be seen with insulin or sulfonylureas and may in fact facilitate weight loss. It may be used as a bridge to insulin therapy or to reduce insulin requirements of insulin-resistant patients in order to avoid weight gain. Although it has not been studied in patients with renal or hepatic insufficiency, its safety profile may make it the preferred agent in these patients. GLP-1 is also unique in that it has been shown to reduce the inappropriate rise in glucagon. It may also promote  $\beta$ -cell rescue and theoretically halt diabetes progression, although this has not been formally examined in humans. Currently, exenatide's injectable route of delivery and its potential side effects of nausea and vomiting may be the main barriers to widespread use. Further long-term studies are needed to determine its long-term efficacy, effects on weight, and potential for  $\beta$ -cell recovery and benefit to cardiac function.

## REFERENCES

- Nielsen LL, Young AA, Parkes DG: Pharmacology of exenatide (synthetic exendin-4): a potential therapeutic for improved glycemic control of type 2 diabetes. *Regul Pept* 117:77–88, 2004
- Nauck MA, Niedereich-Holz U, Ettler R, Holst JJ, Orskov C, Ritzel R: Glucagon-like peptide 1 inhibition of gastric emptying outweighs its insulinotropic effects in healthy humans. *Am J Physiol* 273:E981–E988, 1997
- Orskov C, Holst JJ, Nielsen OV: Effect of truncated glucagon-like peptide-1 [proglucagon-(78–107)amide] on endocrine secretion from pig pancreas, antrum, and nonantral stomach. *Endocrinology* 123:2009–2013, 1988
- Stoffers DA, Kieffer TJ, Hussain MA, Drucker DJ, Bonner-Weir S, Habener JF, Egan JM: Insulinotropic glucagon-like peptide-1 agonists stimulate expression of homeodomain protein IDX-1 and increase islet size in mouse pancreas. *Diabetes* 49:741–748, 2000
- Zhou J, Wang X, Pineyro MA, Egan JM: Glucagon-like peptide-1 and exendin-4 convert pancreatic AR42J cells into glucagon- and insulin-producing cells. *Diabetes* 48:2358–2366, 1999
- Tang-Christensen M, Larsen PJ, Goke R, Fink-Jensen A, Jessop DS, Moller M, Sheikh SP: Central administration of GLP-1-(7–36) amide inhibits food and water intake in rats. *Am J Physiol* 271:R848–R856, 1996
- Vilshol T, Krarup T, Sonne J, Madsbad S, Volund A, Juul AG, Holst JJ: Incretin secretion in relation to meal size and body weight in healthy subjects and people with type 1 and type 2 diabetes mellitus. *J Clin Endocrinol Metab* 88:2706–2713, 2003
- Egan JM, Meneilly GS, Habener JF, Elahi D: Glucagon-like peptide-1 augments insulin-mediated glucose uptake in the obese state. *J Clin Endocrinol Metab* 87:3768–3773, 2002
- Fehmann HC, Habener JF: Insulinotropic hormone glucagon-like peptide-1(7–37) stimulation of proinsulin gene expression and proinsulin biosynthesis in insulinoma beta TC-1 cells. *Endocrinology* 130:159–166, 1992
- Buteau J, Roduit R, Susini S, Prentki M: Glucagon-like peptide-1 promotes DNA synthesis, activates phosphatidylinositol 3-kinase and increases transcription factor pancreatic and duodenal homeobox gene 1 (PDX-1) DNA binding activity in beta (INS-1)-cells. *Diabetologia* 42:856–864, 1999
- Brissova M, Shiota M, Nicholson WE, Gannon M, Knobel SM, Piston DW, Wright CV, Powers AC: Reduction in pancreatic transcription factor PDX-1 impairs glucose-stimulated insulin secretion. *J Biol Chem* 277:11225–11232, 2002
- Drucker DJ, Philippe J, Mojsov S, Chick WL, Habener JF: Glucagon-like peptide I stimulates insulin gene expression and increases cyclic AMP levels in a rat islet cell line. *Proc Natl Acad Sci USA* 84:3434–3438, 1987
- Brubaker PL, Drucker DJ: Structure-function of the glucagon receptor family of G protein-coupled receptors: the glucagons, GIP, GLP-1, and GLP-2 receptors. *Receptors Channels* 8:179–188, 2002
- Scrocchi LA, Brown TJ, Maclusky N, Brubaker PL, Auerbach AB, Joyner AL, Drucker DJ: Glucose intolerance but normal satiety in mice with a null mutation in the glucagon-like peptide 1 receptor gene. *Nat Med* 2:1254–1258, 1996
- Parkes DG, Pittner R, Jodka C, Smith P, Young A: Insulinotropic actions of exendin-4 and glucagon-like peptide-1 in vivo and in vitro. *Metabolism* 50:583–589, 2001
- Conarello SL, Li Z, Ronan J, Roy RS, Zhu L, Jiang G, Lui F, Woods J, Zychand E, Moller DE, Thornberry NA, Zhang BB: Mice lacking dipeptidyl peptidase IV are protected against obesity and insulin resistance. *Proc Natl Acad Sci U S A* 100:6825–6830, 2003
- Eng J, Kleinman WA, Singh L, Raufman JP: Isolation and characterization of exendin-4, an exendin-3 analogue, from *Heloderma suspectum* venom: further evidence for an exendin receptor on dispersed acini from guinea pig pancreas. *J Biol Chem* 267:7402–7405, 1992
- Perry T, Greig NH: The glucagon-like peptides: a double-edged therapeutic sword? *Trends Pharmacol Sci* 24:377–383, 2003
- Idris I, Patiag D, Gray S, Donnelly R: Exendin-4 increases insulin sensitivity via a PI-3-kinase-dependent mechanism: contrasting effects of GLP-1. *Biochem Pharmacol* 63:993–996, 2002
- Egan JM, Montrose-Ratizadeh C, Wang Y, Bernier M, Roth J: Glucagon-like peptide 1 (7–36) amide (GLP-1) enhances insulin-stimulated glucose metabolism in 3T3-L1 adipocytes: one of several potential extrapancreatic sites of GLP-1 action. *Endocrinology* 135:2070–2075, 1994
- Montrose-Ratizadeh C, Yang H, Wang Y, Roth J, Montrose MH, Adams LG: Novel signal transduction and peptide specificity of glucagon-like peptide receptor in 3T3-L1 adipocytes. *J Cell Physiol* 172:275–283, 1997
- Nishizawa M, Nakabayashi H, Kawai K, Ito T, Kawakami S, Nakagawa A, Nijima A, Uchida K: The hepatic vagal reception of intraportal GLP-1 is via receptor different from the pancreatic GLP-1 receptor. *J Auton Nerv Syst* 80:14–21, 2000
- Egan JM, Clocquet AR, Elahi D: The insulinotropic effect of acute exendin-4 administered to humans: comparison of nondiabetic state to type 2 diabetes. *J Clin Endocrinol Metab* 87:1282–1290, 2002
- Greig NH, Holloway HW, De Ore KA, Jani D, Wang Y, Zhou J, Garant MJ, Egan JM: Once daily injection of exendin-4 to diabetic mice achieves long-term beneficial effects on blood glucose concentrations. *Diabetologia* 42:45–50, 1999
- Young YA, Gedulin BR, Bhavsar S, Bodkin N, Jodka C, Hansen B: Glucose-lowering and insulin-sensitizing actions of exendin-4: studies in obese diabetic (*ob/ob*, *db/db*) mice, diabetic fatty Zucker rats, and diabetic rhesus monkeys (*Macaca mulatta*). *Diabetes* 48:1026–1034, 1999
- Kastin AJ, Akerstrom V: Entry of exendin-4 into brain is rapid but may be limited at high doses. *Int J Obesity* 27:313–318, 2002
- Goke R, Larsen PJ, Mikkelsen JD, Sheikh SP: Distribution of GLP-1 binding sites in the rat brain: evidence that exendin-4 is a ligand of brain GLP-1 binding sites. *Eur J Neurosci* 7:2294–2300, 1995
- Szayna M, Doyle ME, Betkey JA, Holloway HW, Spencer RGS, Greig NH, Egan JM: Exendin-4 decelerates food intake, weight gain, and fat deposition in Zucker rats. *Endocrinology* 141:1936–1941, 2000
- Egan JM, Meneilly GS, Elahi D: Effects of 1-mo bolus subcutaneous administration of exendin-4 in type 2 diabetes. *Am J Physiol Endocrinol Metab* 284:E1072–E1079, 2003
- Toft-Nielsen M, Madsbad S, Holst JJ: The effect of glucagon-like peptide I (GLP-1) on glucose elimination in healthy subjects depends on the pancreatic glucoregulatory hormones. *Diabetes* 45:552–556, 1996
- Kolterman OG, Buse JB, Fineman MS, Gaines E, Heintz S, Bicsak TA, Taylor K, Kim D, Aisporna M, Wang Y, Baron AD: Synthetic exendin-4 (exenatide) significantly reduces postprandial and fasting plasma glucose in subjects with type 2 diabetes. *J Clin Endocrinol Metab* 88:3082–3089, 2003
- Rayner CK, Samsom M, Jones KL, Horowitz M: Relationships of upper gastrointes-

tinal motor and sensory function with glycemic control. *Diabetes Care* 24:371–381, 2001

<sup>33</sup>Dupre J, Behme MT, McDonald TJ: Exendin-4 normalized postcibal glycemic excursions in type 1 diabetes. *J Clin Endocrinol Metab* 89:3469–3473, 2004

<sup>34</sup>Reaven GM, Chen YD, Golay A, Swislocki AL, Jaspan JB: Documentation of hyperglucagonemia throughout the day in nonobese and obese patients with noninsulin-dependent diabetes mellitus. *J Clin Endocrinol Metab* 64:106–110, 1987

<sup>35</sup>Mahler RJ, Adler ML: Type 2 diabetes mellitus: update on diagnosis, pathophysiology, and treatment. *J Clin Endocrinol Metab* 84:1165–1171, 1999

<sup>36</sup>Fineman MS, Bicsak TA, Shen LZ, Taylor K, Gaines E, Varns A, Kim D, Baron AD: Effect on glycemic control of exenatide (synthetic exendin-4) additive to existing metformin and/or sulfonylurea treatment in patients with type 2 diabetes. *Diabetes Care* 2003;26:2370–2377.

<sup>37</sup>Fineman MS, Shen LZ, Taylor K, Kim DD, Baron AD: Effectiveness of progressive dose-escalation of exenatide (exendin-4) in reducing dose-limiting side effects in subjects with type 2 diabetes. *Diabetes Metab Res Rev* 20:411–417, 2004

<sup>38</sup>Degn KB, Brock B, Juhl CB, Djurhuus CB, Grubert J, Kim D, Han J, Taylor K, Fineman M, Schmitz O: Effect of intravenous infusion of exenatide (synthetic exendin-4) on glucose-dependent insulin secretion and counterregulation during hypoglycemia. *Diabetes* 53:2397–2403, 2004

<sup>39</sup>Buse JB, Henry RR, Han J, Kim DD, Fineman MS, Baron AD: Effects of exenatide (exendin-4) on glycemic control over 30 weeks in sulfonylurea-treated patients with type 2 diabetes. *Diabetes Care* 27:2628–2635, 2004

<sup>40</sup>DeFronzo R, Ratner R, Han J, Kim D, Fineman M, Baron AD: Effects of exenatide (synthetic exendin-4) on glycemic control and weight over 30 weeks in metformin-treated patients with type 2 diabetes (late-breaking abstract 6). American Diabetes Association 64th Scientific Sessions, Orlando, Fla., June 4–8, 2004

<sup>41</sup>Kendall DM, Riddle MC, Zhuang D, Kim DD, Fineman MS, Baron AD: Effects of exenatide (exendin-4) on glycemic control and weight in patients with type 2 diabetes treated with metformin and a sulfonylurea (late-breaking abstract 10). American Diabetes Association 64th Scientific Sessions, Orlando, Fla., June 4–8, 2004

<sup>42</sup>Edwards CMB, Stanley SA, Davis R, Brynes AE, Frost GS, Seal LJ, Gbatei MA, Bloom SR: Exendin-4 reduces fasting and postprandial glucose and decreases energy intake in healthy volunteers. *Am J Physiol Endocrinol Metab* 281:E155–E161, 2001

<sup>43</sup>Flint A, Raben A, Astrup A, Holst JJ: Glucagon-like peptide 1 promotes satiety and suppresses energy intake in humans. *J Clin Invest* 101:515–520, 1998

<sup>44</sup>Gutzwiller JP, Drewe J, Goke B, Schmidt H, Rohrer B, Lareida J, Beglinger C: Glucagon-like peptide 1 promotes satiety and reduces food intake in patients with diabetes mellitus type 2. *Am J Physiol* 277:R1541–R1544, 1999

<sup>45</sup>Gutzwiller JP, Goke B, Drewe J, Hildebrand P, Ketterer S, Handschin D, Winterhalder R,

Conen D, Beglinger C: Glucagon-like peptide-1: a potent regulator of food intake in humans. *Gut* 44:81–86, 1999

<sup>46</sup>Naslund E, Barkeling B, King N, Gutniak M, Blundell JE, Holst JJ, Rossner S, Hellstrom PM: Energy intake and appetite are suppressed by glucagon-like peptide-1 (GLP-1) in obese men. *Int J Obes* 23:304–311, 1999

<sup>47</sup>Long SJ, Sutton JA, Amae WB, Giouvanoudi A, Spyrou NM, Rogers PJ, Morgan LV: No effect of glucagon-like peptide-1 on short-term satiety and energy intake in man. *Br J Nutr* 81:273–279, 1999

<sup>48</sup>Nystrom T, Gutniak MK, Zhang Q, Zhang F, Holst JJ, Ahren B, Sjolholm A: Effects of glucagon-like peptide-1 on endothelial function in type 2 diabetes patients with stable coronary artery disease. *Am J Physiol Endocrinol Metab* 287:1209–1215, 2004

<sup>49</sup>Nikolaidis LA, Elahi D, Hentosz T, Doverspike A, Huerbin R, Zourelis L, Stolarski C, Shen YT, Shannon RP: Recombinant glucagon-like peptide-1 increases myocardial glucose uptake and improves left ventricular performance in conscious dogs with pacing-induced dilated cardiomyopathy. *Circulation* 110:955–961, 2004

<sup>50</sup>Mudaliar S, Edelman SV: Insulin therapy in type 2 diabetes. *Endocrinol Metab Clin North Am* 30:935–982, 2001

<sup>51</sup>Olsen LK, Redmon JB, Towle HC, Robertson RP: Chronic exposure of HIT cells to high glucose concentrations paradoxically decreases insulin gene transcription and alters binding of insulin gene regulatory protein. *J Clin Invest* 92:514–519, 1993

<sup>52</sup>Koyama M, Wada R, Sakuraba H, Mizukami H, Yagihashi S: Accelerated loss of islet B-cells in sucrose-fed Goto-Kakizaki rats, a genetic model of non-insulin-dependent diabetes mellitus. *Am J Pathol* 153:537–545, 1998

<sup>53</sup>Xu G, Stoffers DA, Habener JF, Bonner-Weir S: Exendin-4 stimulates both  $\beta$ -cell replication and neogenesis, resulting in increased  $\beta$ -cell mass and improved glucose tolerance in diabetic rats. *Diabetes* 48:2270–2276, 1999

<sup>54</sup>Nielsen JH, Galsgaard ED, Møldrup A, Nissen-Friedrichsen B, Billestrup N, Hansen JA, Lee YC, Carlsson C: Regulation of  $\beta$ -cell mass by hormones and growth factors. *Diabetes* 50 (Suppl. 1):S25–S29, 2001

<sup>55</sup>Tourrel C, Bailbe D, Meile MJ, Kergoat M, Portha B: Glucagon-like peptide-1 and exendin-4 stimulate  $\beta$ -cell neogenesis in streptozotocin-treated newborn rats resulting in persistently improved glucose homeostasis at adult age. *Diabetes* 50:1562–1570, 2001

<sup>56</sup>Abraham EJ, Leech CA, Lin JC, Zulewski H, Habener JF: Insulinotropic hormone glucagon-like peptide-1 differentiation of human pancreatic islet-derived progenitor cells into insulin-producing cells. *Endocrinology* 143:3152–3161, 2002

<sup>57</sup>Zhou J, Wang X, Pineyro MA, Egan JM: Glucagon-like peptide 1 and exendin-4 convert pancreatic AR42J cells into glucagon- and insulin-producing cells. *Diabetes* 48:2358–2366, 1999

<sup>58</sup>Stoffers DA, Desai BM, DeLeon DD, Simmons RA: Neonatal exendin-4 prevents development of diabetes in the intrauterine growth retarded rat. *Diabetes* 52:734–740, 2003

<sup>59</sup>Perfetti R, Zhou J, Doyle ME, Egan JM: Glucagon-like peptide-1 induces cell proliferation and pancreatic-duodenum homeobox-1 expression and increases endocrine cell mass in the pancreas of old, glucose-intolerant rats. *Endocrinology* 141:4600–4605, 2000

<sup>60</sup>Holst JJ: Treatment of type 2 diabetes mellitus with agonists of the GLP-1 receptor or DPP-IV inhibitors. *Expert Opin Emerg Drugs* 9:155–166, 2004

<sup>61</sup>Exenatide: AC 2993, AC002993, AC2993A, exendin 4, LY2148568. *Drugs R D* 5:35–40, 2004

<sup>62</sup>Pospisilik JA, Stafford SG, Demuth HU, Brownsey R, Parkhouse W, Finegood DT, McIntosh CH, Pederson RA: Long-term treatment with the dipeptidyl peptidase IV inhibitor P32/98 causes sustained improvements in glucose tolerance, insulin sensitivity, hyperinsulinemia, and beta-cell glucose responsiveness in VDF (*fa/fa*) Zucker rats. *Diabetes* 51:943–950, 2002

<sup>63</sup>Pospisilik JA, Stafford SG, Demuth HU, McIntosh CH, Pederson RA: Long-term treatment with dipeptidyl peptidase IV inhibitor improves hepatic and peripheral insulin sensitivity in the VDF Zucker rat: a euglycemic-hyperinsulinemic clamp study. *Diabetes* 51:2677–2683, 2002

<sup>64</sup>Pospisilik JA, Martin J, Doty T, Ehlers JA, Pamiir N, Lynn FC, Piteau S, Demuth HU, McIntosh CH, Pederson RA: Dipeptidyl peptidase IV inhibitor treatment stimulates beta-cell survival and islet neogenesis in streptozotocin-induced diabetic rats. *Diabetes* 52:741–750, 2003

<sup>65</sup>Ahren B, Gomis R, Standl E, Mills D, Schweizer A: Twelve- and 52-week efficacy of the dipeptidyl peptidase IV inhibitor LAF237 in metformin-treated patients with type 2 diabetes. *Diabetes Care* 27:2874–2880, 2004

*Kathleen Dungan, MD, is a subspecialty fellow in the Division of Endocrinology, Department of Medicine at the University of North Carolina School of Medicine in Chapel Hill. John B. Buse, MD, PhD, is an associate professor in the Division of Endocrinology and Division of General Medicine and Clinical Epidemiology, Department of Medicine at the same institution. He is the director of the Diabetes Care Center at the University of North Carolina. He is also an associate editor of Clinical Diabetes.*

**Note of disclosure:** The University of North Carolina has received support related to Dr. Buse's research and consulting activities from Amylin, Eli Lilly, and Novartis, companies actively involved in developing pharmaceuticals that modify the activity of the GLP-1 system.
